# Supplementary material for: Advance directives and real-world end-of-life clinical practice: a case–control study
Source: PubMed Central journal article supplement — BMJ Support Palliat Care. 2021 Mar 22;12(e3):e337–44. doi: 10.1136/bmjspcare-2020-002851 (PMC9380474; doi:10.1136/bmjspcare-2020-002851), 2021-03-22
Supplement: bmjspcare-2020-002851supp001.pdf [file bmjspcare-2020-002851supp001.pdf]

**Appendix 1. ICD-10-CM codes corresponding to causes of death analysed.**

| Cause of death     | ICD-10-CM code |
|--------------------|----------------|
| Cancer             | C00-D46        |
| Mental diseases    | F00-f99        |
| Nervous system     | G00-G99        |
| Circulatory system | I00-I99        |
| Respiratory system | J00-J99        |
| Kidney diseases    | K70-K77        |

**Appendix 2. ICD-10-PCS codes corresponding to procedures during the last year of life analysed.**

| Procedures                    | ICD-10-PCS code                                                                                                                                                                                                                                                                                                                                                                                                                    |
|-------------------------------|------------------------------------------------------------------------------------------------------------------------------------------------------------------------------------------------------------------------------------------------------------------------------------------------------------------------------------------------------------------------------------------------------------------------------------|
| Amputation                    | 77.59, 84.0*, 84.1*, 84.3, 84.91                                                                                                                                                                                                                                                                                                                                                                                                   |
| Antibiotics                   | 99.21, 99.22, 00.14                                                                                                                                                                                                                                                                                                                                                                                                                |
| Artificial nutrition          | 99.15, 96.6*, 97.01, 97.02, 96.08, 96.07                                                                                                                                                                                                                                                                                                                                                                                           |
| Cardiopulmonary resuscitation | 99.60                                                                                                                                                                                                                                                                                                                                                                                                                              |
| Dialysis                      | 50.92, 54.98, 39.95                                                                                                                                                                                                                                                                                                                                                                                                                |
| Endoscopy                     | 33.7*, 49.21, 33.23, 33.21, 33.24, 33.22, 33.27, 57.32, 57.31, 45.23, 45.22, 52.13, 42.23, 42.22, 44.13, 44.12, 29.11, 70.22, 45.13, 45.12, 45.24, 45.22, 45.23, 45.13, 45.12, 45.13, 45.16, 31.42, 31.41, 34.22, 54.21, 48.23, 48.22, 55.21, 34.21, 34.22, 34.21, 31.42, 31.41, 56.31, 58.22, 68.12, 70.21, 51.11, 51.10, 51.98, 51.96, 42.24, 45.14, 45.25, 31.43, 31.44, 48.24, 55.22, 56.33, 56.35, 57.21, 68.15, 68.16, 51.14 |
| Intubation                    | 96.04, 96.01, 96.02                                                                                                                                                                                                                                                                                                                                                                                                                |
| IV fluids/drugs               | 99.1*, 99.2*                                                                                                                                                                                                                                                                                                                                                                                                                       |
| Mechanical ventilation        | 96.7*, 93.90-93.99                                                                                                                                                                                                                                                                                                                                                                                                                 |
| Nasogastric probe             | 96.07                                                                                                                                                                                                                                                                                                                                                                                                                              |
| Ostomy**                      | 43.11, 46.1, 45.49, 45.71, 45.79, 45.8, 46.2, 45.34, 45.61, 45.63                                                                                                                                                                                                                                                                                                                                                                  |
| Pain treatment                | 03.90, 03.91, 05.23, 05.24                                                                                                                                                                                                                                                                                                                                                                                                         |
| Thoracentesis                 | 34.04, 34.91                                                                                                                                                                                                                                                                                                                                                                                                                       |
| Tracheostomy                  | 31.1-31.29, 30.3, 30.4, 96.55                                                                                                                                                                                                                                                                                                                                                                                                      |
| Transfusion                   | 99.0*                                                                                                                                                                                                                                                                                                                                                                                                                              |

\*\*Gastrostomy, ileostomy, colostomy, and resections.

Note: Surgery, palliative care, transplant, emergencies, and transfers have been identified through the hospital discharge database.
