# Supplementary material for: Advance directives and real-world end-of-life clinical practice: a case–control study
Source: PubMed Central journal article supplement — BMJ Support Palliat Care. 2021 Mar 22;12(e3):e337–44. doi: 10.1136/bmjspcare-2020-002851 (PMC9380474; doi:10.1136/bmjspcare-2020-002851), 2021-03-22
Supplement: bmjspcare-2020-002851supp002.pdf [file bmjspcare-2020-002851supp002.pdf]

**Table S1. Frequency of the procedures performed during the last year of life among people who died in Catalonia 2014–2015 and had completed ADs versus those who had not, stratified by sex. Crude Odds Ratios (CI95%).**

| Procedures                    | Women |       |          |       |                       |         | Men   |       |          |       |                       |         |
|-------------------------------|-------|-------|----------|-------|-----------------------|---------|-------|-------|----------|-------|-----------------------|---------|
|                               | Cases |       | Controls |       | Crude model           |         | Cases |       | Controls |       | Crude Model           |         |
|                               | N     | %     | N        | %     | Odds Ratio<br>(IC95%) | p-valor | %     | N     | %        | N     | Odds Ratio<br>(IC95%) | p-valor |
|                               |       |       |          |       |                       |         |       |       |          |       |                       |         |
| Surgery                       | 68    | 7.26  | 206      | 11.00 | 0.62 (0.47;0.84)      | <0.01   | 95    | 12.09 | 200      | 12.67 | 0.95 (0.72;1.24)      | 0.68    |
| Pain treatment                | 1     | 0.11  | 8        | 0.43  | *                     |         | 2     | 0.25  | 3        | 0.19  | *                     |         |
| Transplant                    | 2     | 0.21  | 4        | 0.21  | *                     |         | 4     | 0.51  | 3        | 0.19  | *                     |         |
| Palliative care               | 47    | 5.02  | 92       | 4.91  | 1.04 (0.71;1.53)      | 0.84    | 46    | 5.85  | 78       | 4.94  | 1.27 (0.83;1.92)      | 0.27    |
| Mechanical ventilation        | 120   | 12.81 | 261      | 13.93 | 0.91 (0.71;1.15)      | 0.42    | 109   | 13.87 | 293      | 18.57 | 0.68 (0.53;0.88)      | <0.01   |
| Ostomy**                      | 11    | 1.17  | 26       | 1.39  | 0.83 (0.40;1.74)      | 0.63    | 13    | 1.65  | 19       | 1.20  | 1.34 (0.66;2.71)      | 0.42    |
| Artificial nutrition          | 17    | 1.81  | 62       | 3.31  | 0.54 (0.31;0.93)      | 0.03    | 18    | 2.29  | 46       | 2.92  | 0.76 (0.44;1.32)      | 0.33    |
| Cardiopulmonary resuscitation | 3     | 0.32  | 5        | 0.27  | *                     |         | 2     | 0.25  | 7        | 0.44  | *                     |         |
| Nasogastric probe             | 13    | 1.39  | 26       | 1.39  | 1.02 (0.52;2.01)      | 0.95    | 9     | 1.15  | 25       | 1.58  | 0.72 (0.34;1.54)      | 0.40    |
| Endoscopy                     | 55    | 5.87  | 162      | 8.65  | 0.64 (0.46;0.89)      | 0.01    | 71    | 9.03  | 185      | 11.72 | 0.74 (0.56;1.00)      | 0.05    |
| Transfusions                  | 71    | 7.58  | 201      | 10.73 | 0.68 (0.51;0.90)      | 0.01    | 87    | 11.07 | 196      | 12.42 | 0.86 (0.64;1.14)      | 0.29    |
| Thoracentesis                 | 20    | 2.13  | 74       | 3.95  | 0.53 (0.32;0.87)      | 0.01    | 30    | 3.82  | 61       | 3.87  | 1.01 (0.64;1.59)      | 0.97    |
| IV fluids/drugs               | 225   | 24.01 | 481      | 25.68 | 0.90 (0.74;1.10)      | 0.30    | 218   | 27.74 | 472      | 29.91 | 0.88 (0.72;1.09)      | 0.24    |
| Antibiotics                   | 109   | 11.63 | 248      | 13.24 | 0.85 (0.67;1.09)      | 0.21    | 114   | 14.50 | 252      | 15.97 | 0.89 (0.69;1.15)      | 0.37    |
| Tracheostomy                  | 1     | 0.11  | 13       | 0.69  | *                     |         | 5     | 0.64  | 34       | 2.15  | *                     |         |
| Dialysis                      | 12    | 1.28  | 12       | 0.64  | 2.00 (0.90;4.45)      | 0.09    | 12    | 1.53  | 25       | 1.58  | 0.96 (0.48;1.91)      | 0.91    |
| Amputation                    | 2     | 0.21  | 9        | 0.48  | *                     |         | 6     | 0.76  | 13       | 0.82  | *                     |         |
| Intubation                    | 21    | 2.24  | 47       | 2.51  | 0.91 (0.53;1.55)      | 0.72    | 23    | 2.93  | 73       | 4.63  | 0.59 (0.36;0.97)      | 0.04    |
| Transfers                     | 152   | 16.22 | 369      | 19.70 | 0.79 (0.64;0.97)      | 0.03    | 127   | 16.16 | 314      | 19.90 | 0.76 (0.61;0.96)      | 0.02    |
| Emergencies                   | 714   | 76.20 | 1496     | 79.87 | 0.80 (0.66;0.97)      | 0.02    | 608   | 77.35 | 1329     | 84.22 | 0.62 (0.50;0.78)      | <0.01   |

\*Not enough cases for modelling; \*\*Gastrostomy, ileostomy, colostomy, and resections.

**Table S2. Frequency of the procedures performed during the last year of life among people who died of cancer in Catalonia 2014–2015 and had completed ADs versus those who had not, stratified by sex. Crude Odds Ratios (CI95%).**

| Procedures                    | Women |       |          |       |                       |         | Men   |       |          |       |                       |         |
|-------------------------------|-------|-------|----------|-------|-----------------------|---------|-------|-------|----------|-------|-----------------------|---------|
|                               | Cases |       | Controls |       | Crude model           |         | Cases |       | Controls |       | Crude model           |         |
|                               | N     | %     | N        | %     | Odds Ratio<br>(IC95%) | p-valor | N     | %     | N        | %     | Odds Ratio<br>(IC95%) | p-valor |
| Surgery                       | 47    | 11.75 | 147      | 18.35 | 0.59 (0.41;0.84)      | <0.01   | 67    | 17.72 | 140      | 18,32 | 0.96 (0.69;1.33)      | 0.80    |
| Pain treatment                | 1     | 0.25  | 4        | 0.50  | *                     |         | 2     | 0.53  | 2        | 0,26  | *                     |         |
| Transplant                    | 2     | 0.50  | 3        | 0.37  | *                     |         | 3     | 0.79  | 3        | 0,39  | *                     |         |
| Palliative care               | 37    | 9.25  | 76       | 9.49  | 0.98 (0.64;1.52)      | 0.94    | 44    | 11.64 | 73       | 9,55  | 1.31 (0.85;2.01)      | 0.22    |
| Mechanical ventilation        | 30    | 7.50  | 85       | 10.61 | 0.69 (0.45;1.06)      | 0.09    | 36    | 9.52  | 116      | 15,18 | 0.58 (0.39;0.87)      | 0.01    |
| Ostomy**                      | 2     | 0.50  | 17       | 2.12  | 0.24 (0.05;1.02)      | 0.05    | 4     | 1.06  | 14       | 1,83  | 0.57 (0.19;1.74)      | 0.32    |
| Artificial nutrition          | 9     | 2.25  | 34       | 4.24  | 0.52 (0.25;1.10)      | 0.09    | 9     | 2.38  | 29       | 3,80  | 0.61 (0.29;1.29)      | 0.19    |
| Cardiopulmonary resuscitation | 0     | 0.00  | 2        | 0.25  | *                     |         | 0     | 0.00  | 0        | 0,00  | *                     |         |
| Nasogastric probe             | 10    | 2.50  | 17       | 2.12  | 1.23 (0.55;2.75)      | 0.62    | 8     | 2.12  | 19       | 2,49  | 0.84 (0.37;1.92)      | 0.68    |
| Endoscopy                     | 37    | 9.25  | 133      | 16.60 | 0.51 (0.34;0.75)      | <0.01   | 58    | 15.34 | 143      | 18,72 | 0.79 (0.57;1.10)      | 0.17    |
| Transfusions                  | 51    | 12.75 | 123      | 15.36 | 0.81 (0.57;1.15)      | 0.24    | 51    | 13.49 | 128      | 16,75 | 0.75 (0.52;1.08)      | 0.12    |
| Thoracentesis                 | 12    | 3.00  | 56       | 6.99  | 0.41 (0.22;0.77)      | 0.01    | 21    | 5.56  | 45       | 5,89  | 0.96 (0.56;1.66)      | 0.89    |
| IV fluids/drugs               | 114   | 28.50 | 261      | 32.58 | 0.81 (0.62;1.07)      | 0.14    | 129   | 34.13 | 266      | 34,82 | 0.96 (0.72;1.28)      | 0.80    |
| Antibiotics                   | 49    | 12.25 | 119      | 14.86 | 0.80 (0.56;1.14)      | 0.22    | 74    | 19.58 | 130      | 17,02 | 1.24 (0.88;1.73)      | 0.22    |
| Tracheostomy                  | 1     | 0.25  | 5        | 0.62  | *                     |         | 1     | 0.26  | 17       | 2,23  | *                     |         |
| Dialysis                      | 3     | 0.75  | 3        | 0.37  | 2.00 (0.40;9.91)      | 0.40    | 3     | 0.79  | 13       | 1,70  | 0.46 (0.13;1.62)      | 0.23    |
| Amputation                    | 1     | 0.25  | 1        | 0.12  | *                     |         | 0     | 0.00  | 3        | 0,39  | *                     |         |
| Intubation                    | 3     | 0.75  | 14       | 1.75  | 0.43 (0.12;1.49)      | 0.18    | 3     | 0.79  | 23       | 3,01  | 0.26 (0.08;0.87)      | 0.03    |
| Transfers                     | 68    | 17.00 | 173      | 21.60 | 0.74 (0.54;1.02)      | 0.06    | 75    | 19.84 | 180      | 23,56 | 0.79 (0.58;1.08)      | 0.14    |
| Emergencies                   | 290   | 72.50 | 653      | 81.52 | 0.60 (0.46;0.80)      | <0.01   | 296   | 78.31 | 668      | 87,43 | 0.49 (0.35;0.69)      | <0.01   |

\*Not enough cases for modelling; \*\*Gastrostomy, ileostomy, colostomy, and resections.
